# Supplementary material
Source: Copernicus journal article supplement (doi:10.5194/gmd-19-6001-2026)
Supplement: Supplementary file 1 [file gmd-19-6001-2026-supplement.pdf]

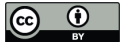

*Supplement of*

**Evaluating the radiative fidelity of WRF-driven PALM (v25.04) in high-resolution using RTM: impact of diverse urban morphology and vegetation on short-wave radiation**

**Jelena Radović et al.**

*Correspondence to:* Jelena Radović ([jelena.radovic@matfyz.cuni.cz](mailto:jelena.radovic@matfyz.cuni.cz))

The copyright of individual parts of the supplement might differ from the article licence.

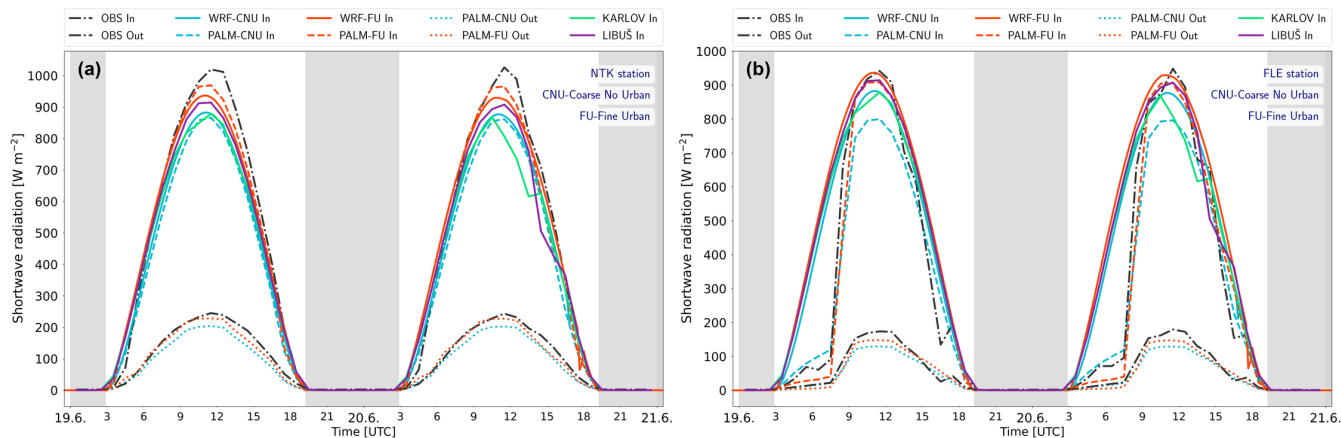

**Figure S1.** The comparison of observed hourly averages of incoming (In) and outgoing (Out) short-wave radiation for the e1 episode at the stations NTK (a) and FLE (b), with PALM model outputs for both WRF configurations. Additional lines represent the raw WRF outputs, Coarse No Urban (WRF-CNU), and Fine Urban (WRF-FU), and measurements from professional meteorological stations in Karlov and Libuš.

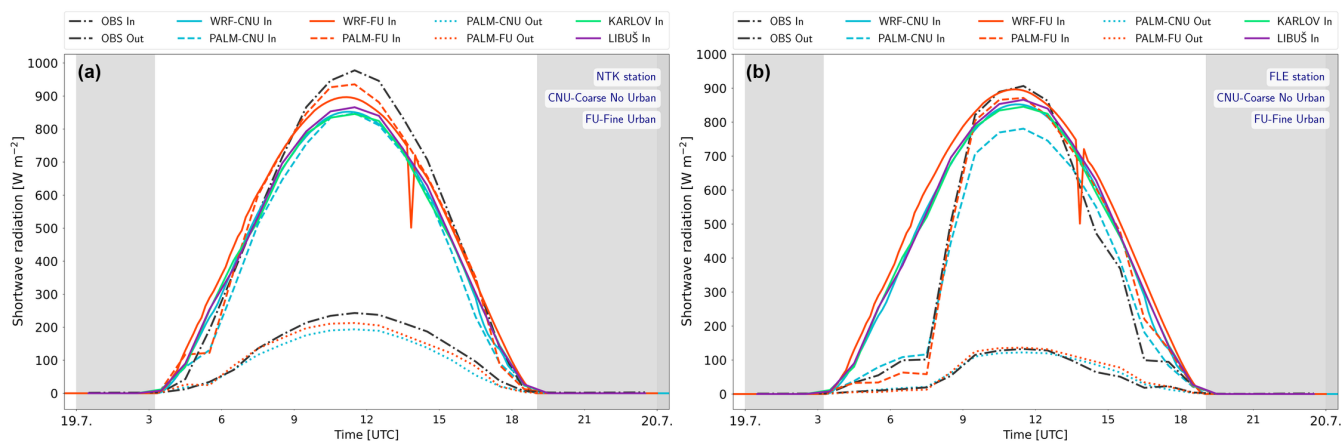

**Figure S2.** The comparison of observed hourly averages of incoming (In) and outgoing (Out) short-wave radiation for the e2 episode at the stations NTK (a) and FLE (b), with PALM model outputs for both WRF configurations. Additional lines represent the raw WRF outputs, Coarse No Urban (WRF-CNU), and Fine Urban (WRF-FU), and measurements from professional meteorological stations in Karlov and Libuš.

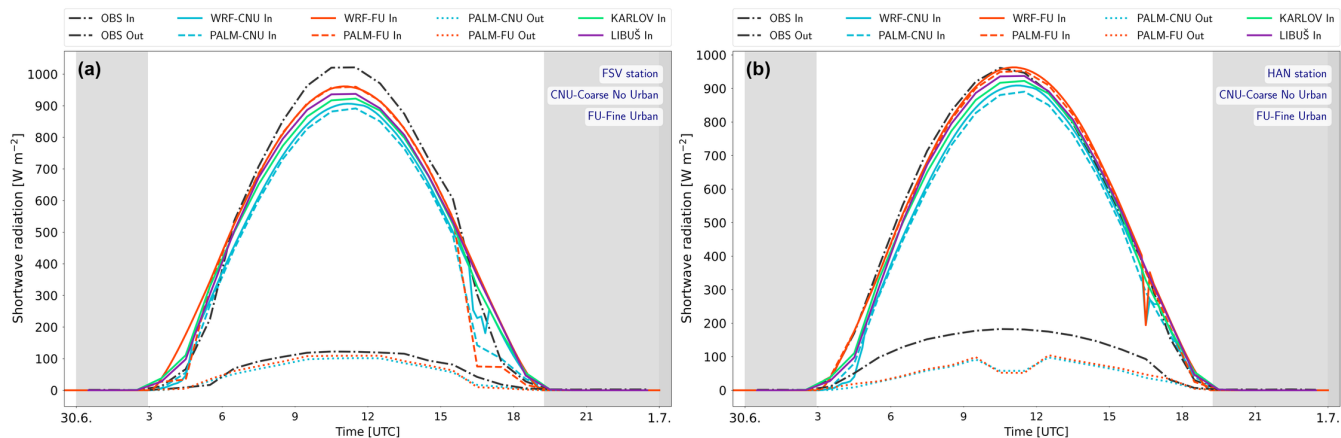

**Figure S3.** The comparison of observed hourly averages of incoming (In) and outgoing (Out) short-wave radiation for the e4 episode at the stations FSV (a) and HAN (b), with PALM model outputs for both WRF configurations. Additional lines represent the raw WRF outputs, Coarse No Urban (WRF-CNU), and Fine Urban (WRF-FU), and measurements from professional meteorological stations in Karlov and Libuš.

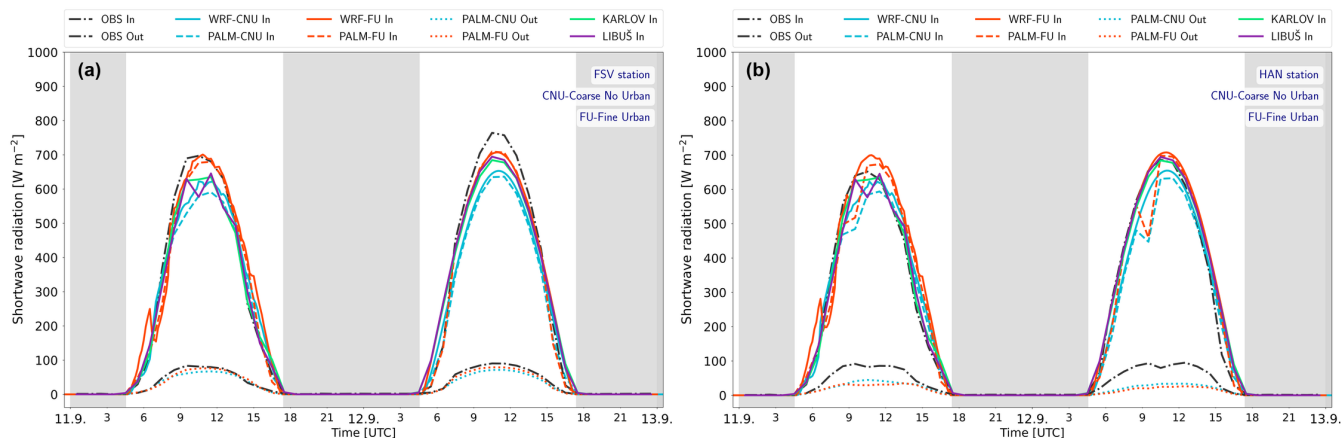

**Figure S4.** The comparison of observed hourly averages of incoming (In) and outgoing (Out) short-wave radiation for the e6 episode at the stations FSV (a) and HAN (b), with PALM model outputs for both WRF configurations. Additional lines represent the raw WRF outputs, Coarse No Urban (WRF-CNU), and Fine Urban (WRF-FU), and measurements from professional meteorological stations in Karlov and Libuš.

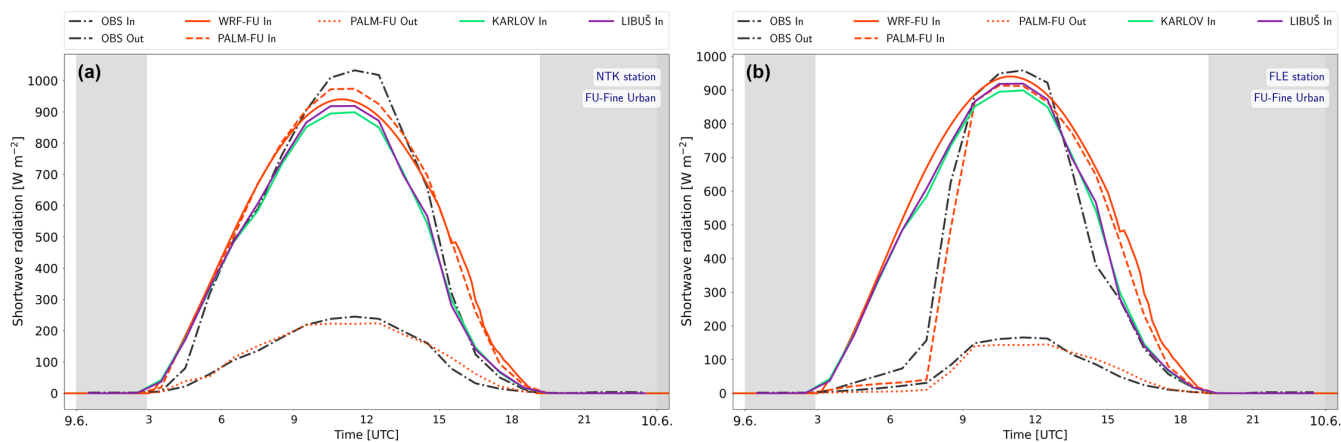

**Figure S5.** The comparison of observed hourly averages of incoming (In) and outgoing (Out) short-wave radiation for the e7 episode at the stations NTK (a) and FLE (b), with PALM model output for WRF Fine Urban (WRF-FU) configuration. Additional lines represent the raw WRF output, Fine Urban (WRF-FU), and measurements from professional meteorological stations in Karlov and Libuš.

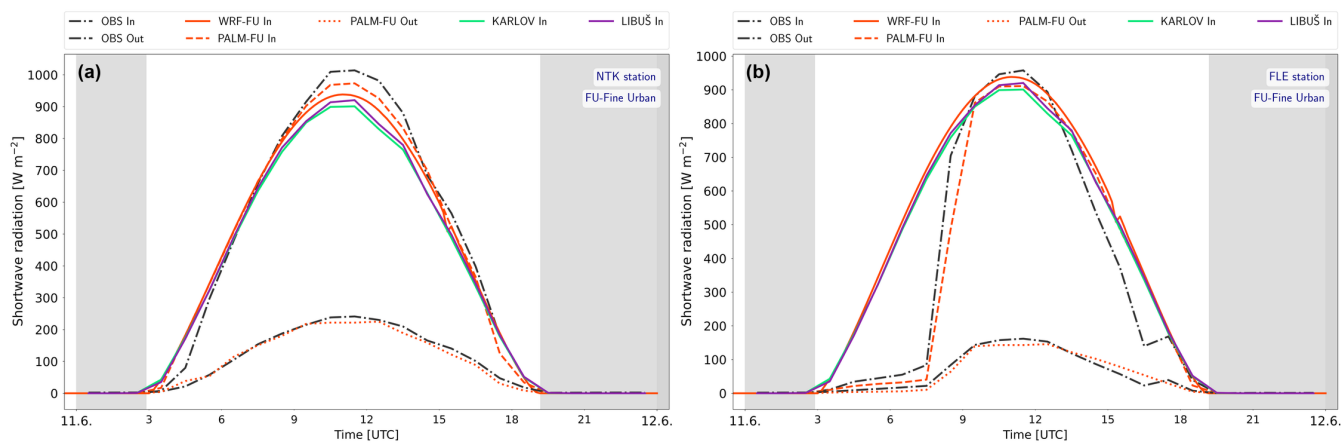

**Figure S6.** The comparison of observed hourly averages of incoming (In) and outgoing (Out) short-wave radiation for the e8 episode at the stations NTK (a) and FLE (b), with PALM model output for WRF Fine Urban (WRF-FU) configuration. Additional lines represent the raw WRF output, Fine Urban (WRF-FU), and measurements from professional meteorological stations in Karlov and Libuš.

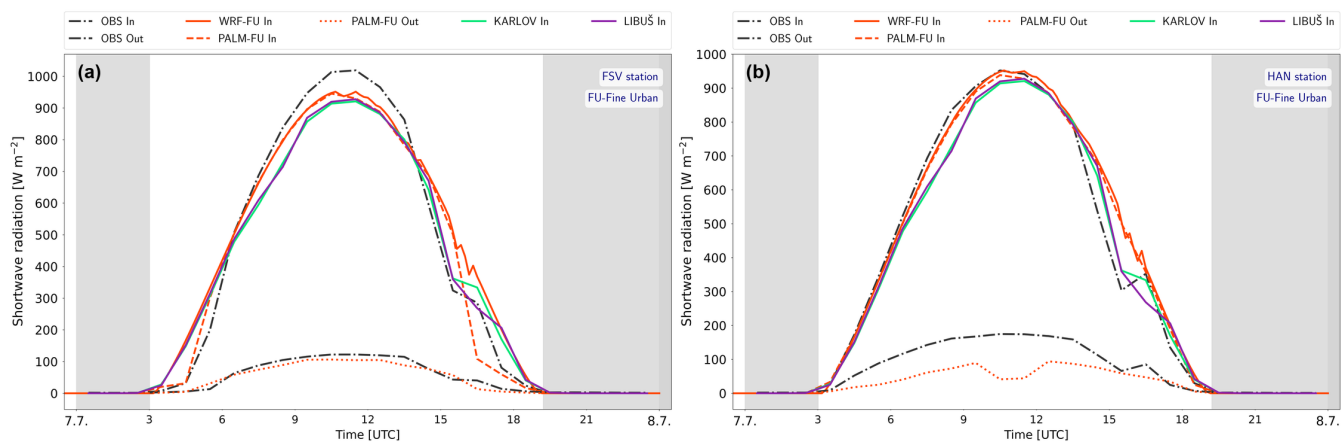

**Figure S7.** The comparison of observed hourly averages of incoming (In) and outgoing (Out) short-wave radiation for the e11 episode at the stations FSV (a) and HAN (b), with PALM model output for WRF Fine Urban (WRF-FU) configuration. Additional lines represent the raw WRF output, Fine Urban (WRF-FU), and measurements from professional meteorological stations in Karlov and Libuš.

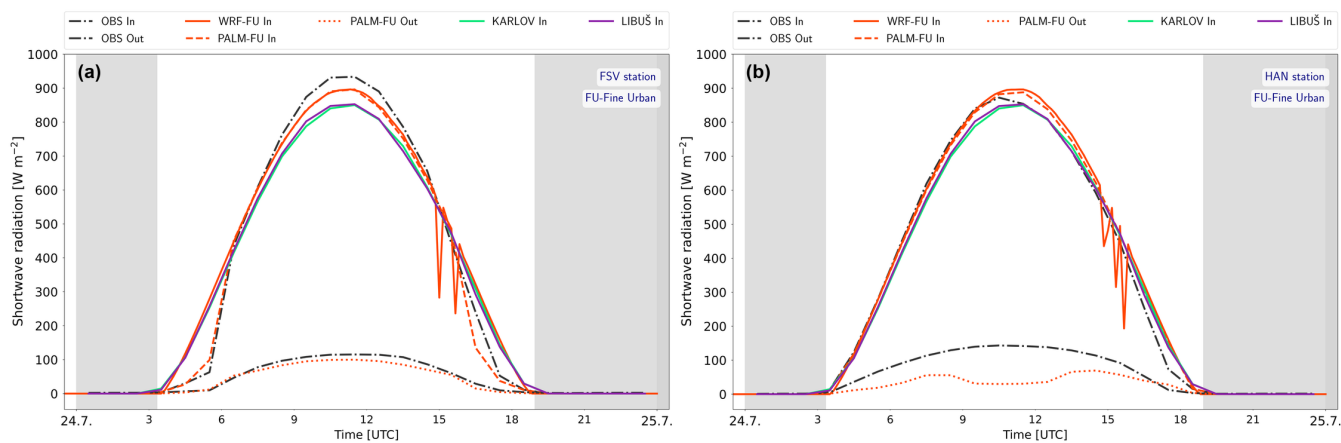

**Figure S8.** The comparison of observed hourly averages of incoming (In) and outgoing (Out) short-wave radiation for the e13 episode at the stations FSV (a) and HAN (b), with PALM model output for WRF Fine Urban (WRF-FU) configuration. Additional lines represent the raw WRF output, Fine Urban (WRF-FU), and measurements from professional meteorological stations in Karlov and Libuš.

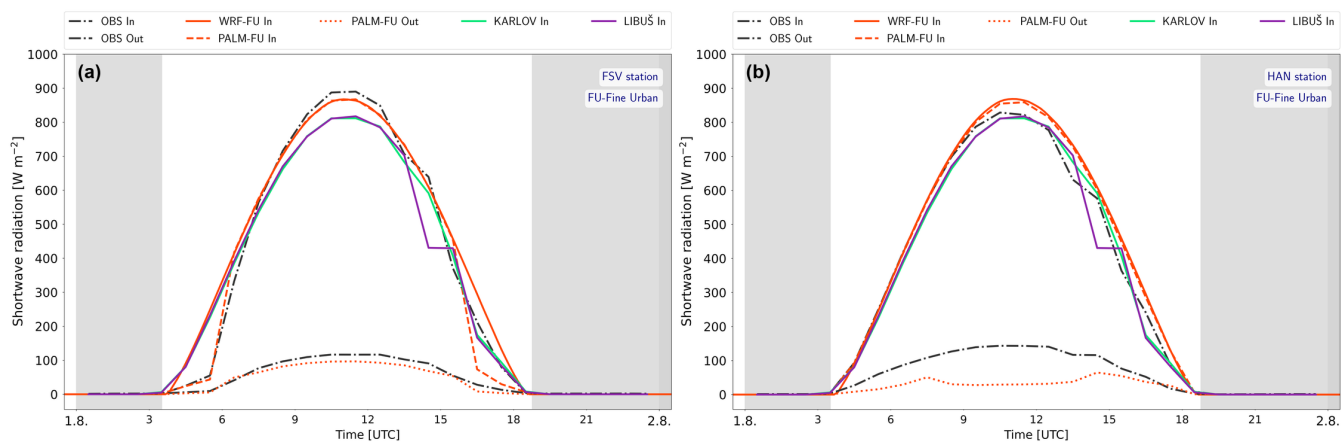

**Figure S9.** The comparison of observed hourly averages of incoming (In) and outgoing (Out) short-wave radiation for the e14 episode at the stations FSV (a) and HAN (b), with PALM model output for WRF Fine Urban (WRF-FU) configuration. Additional lines represent the raw WRF output, Fine Urban (WRF-FU), and measurements from professional meteorological stations in Karlov and Libuš.

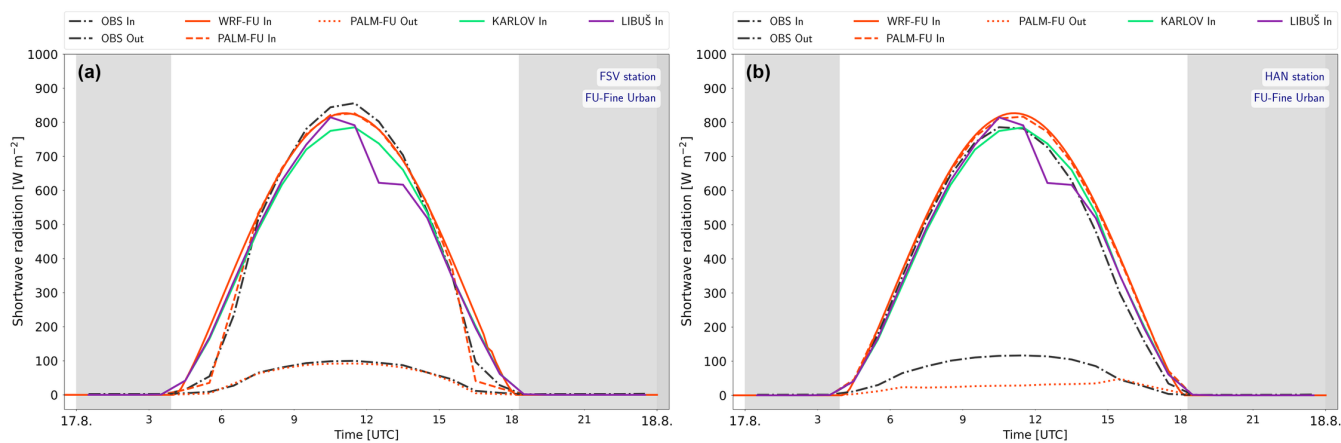

**Figure S10.** The comparison of observed hourly averages of incoming (In) and outgoing (Out) short-wave radiation for the e15 episode at the stations FSV (a) and HAN (b), with PALM model output for WRF Fine Urban (WRF-FU) configuration. Additional lines represent the raw WRF output, Fine Urban (WRF-FU), and measurements from professional meteorological stations in Karlov and Libuš.

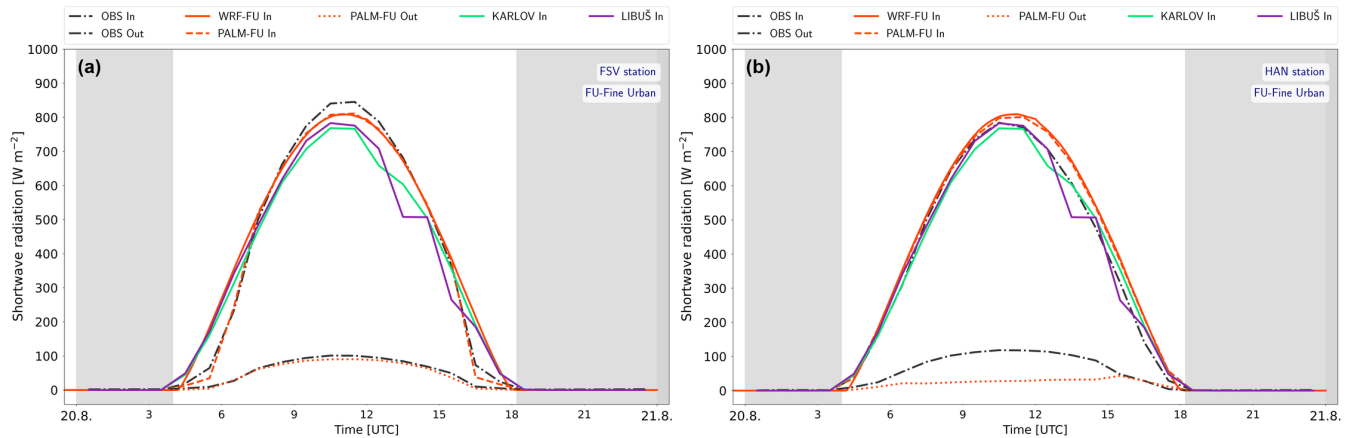

**Figure S11.** The comparison of observed hourly averages of incoming (In) and outgoing (Out) short-wave radiation for the e16 episode at the stations FSV (a) and HAN (b), with PALM model output for WRF Fine Urban (WRF-FU) configuration. Additional lines represent the raw WRF output, Fine Urban (WRF-FU), and measurements from professional meteorological stations in Karlov and Libuš.

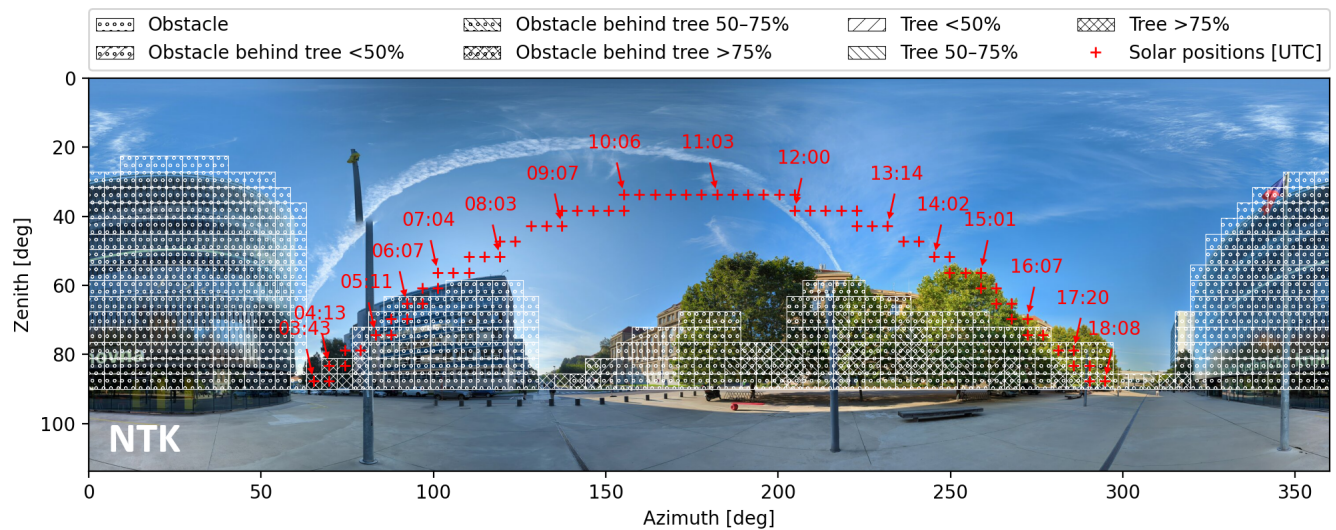

**Figure S12.** Hemispherical view at the NTK observation site with obstructions and vegetation as modelled by PALM, plotted in azimuth–zenith coordinates. Trees and obstacles are classified according to their fractional area coverage. Red crosses indicate the Sun's trajectory throughout the day, with annotated timestamps in UTC.

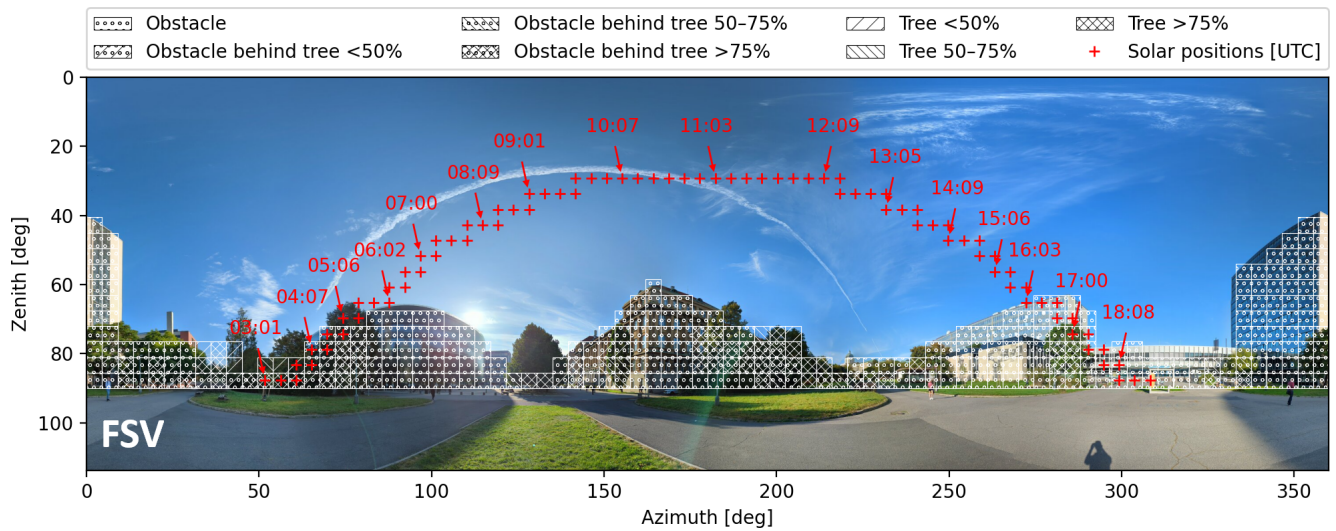

**Figure S13.** Hemispherical view at the FSV observation site with obstructions and vegetation as modelled by PALM, plotted in azimuth–zenith coordinates. Trees and obstacles are classified according to their fractional area coverage. Red crosses indicate the Sun’s trajectory throughout the day, with annotated timestamps in UTC.

**Table S1.** Synoptic weather types and frontal systems crossing through Prague during selected episodes in 2017 and 2018.

| Date            | Weather type                                  | Crossing time [UTC] | Front crossings |                  |           |
|-----------------|-----------------------------------------------|---------------------|-----------------|------------------|-----------|
|                 |                                               |                     | Type            | Direction (from) | Intensity |
| <b>2017</b>     |                                               |                     |                 |                  |           |
| 09 June         | Western anticyclone<br>of summer type (Wal)   | 18                  | Cold            | West             | Medium    |
|                 |                                               | 23                  | Cold            | West             | Medium    |
| 11 June         | Western anticyclone<br>of summer type (Wal)   | 7                   | Warm            | South West       | Weak      |
|                 |                                               | 22                  | Warm            | South West       | Weak      |
| 19–20 June      | Anticyclone/<br>Travelling anticyclone (A/Ap) | 9<br>(20 Jun.)      | Cold            | North West       | Weak      |
| 07 July         | Western cyclone (Wc)                          | 1                   | Cold            | Western          | Medium    |
| 19 July         | Western anticyclone<br>of summer type (Wal)   | No data             | No data         | No data          | No data   |
| 07 August       | Traveling anticyclone (Ap)                    | No data             | No data         | No data          | No data   |
| <b>2018</b>     |                                               |                     |                 |                  |           |
| 16 June         | North East<br>anticyclone (Nea)               | No data             | No data         | No data          | No data   |
| 30 June         | North East<br>anticyclone (Nea)               | No data             | No data         | No data          | No data   |
| 02–03 July      | North West<br>anticyclone (NWa)               | No data             | No data         | No data          | No data   |
| 07 July         | North West<br>anticyclone (NWa)               | 17                  | Occlusive       | North West       | Weak      |
| 21 July         | Low pressure<br>trough (B)                    | 17                  | Occlusive       | South West       | Medium    |
| 24 July         | North West<br>anticyclone (NWa)               | No data             | No data         | No data          | No data   |
| 01 August       | Eastern anticyclone (Ea)                      | No data             | No data         | No data          | No data   |
| 17 August       | Western anticyclone<br>of summer type (Wal)   | 23                  | Cold            | West             | Medium    |
| 20 August       | Western anticyclone<br>of summer type (Wal)   | 2                   | Warm            | West             | Weak      |
|                 |                                               | 15                  | Cold            | North West       | Medium    |
| 11–12 September | Western anticyclone<br>of summer type (Wal)   | 2 (11 Sept.)        | Occlusive       | West             | Medium    |
|                 |                                               | 9 (11 Sept.)        | Warm            | West             | Medium    |
|                 |                                               | 12 Sept.            | No data         | No data          | No data   |

**Table S2.** WRF albedo during 2017 and 2018 at observation stations. WRF–1 km domain.

| Date            | Station | Mean Albedo | Albedo at Noon | Albedo (Noon Avg. +-1 h) |
|-----------------|---------|-------------|----------------|--------------------------|
| 2017            |         |             |                |                          |
| 09 June         | FLE     | 0.199       | 0.156          | 0.156                    |
|                 | NTK     | 0.199       | 0.156          | 0.156                    |
| 11 June         | FLE     | 0.173       | 0.156          | 0.157                    |
|                 | NTK     | 0.173       | 0.156          | 0.157                    |
| 19–20 June      | FLE     | 0.174       | 0.167          | 0.157                    |
|                 | NTK     | 0.174       | 0.167          | 0.157                    |
| 07 July         | FLE     | 0.213       | 0.353          | 0.228                    |
|                 | NTK     | 0.213       | 0.353          | 0.228                    |
| 19 July         | FLE     | 0.181       | 0.157          | 0.156                    |
|                 | NTK     | 0.181       | 0.157          | 0.156                    |
| 07 August       | FLE     | 0.180       | 0.155          | 0.155                    |
|                 | NTK     | 0.180       | 0.155          | 0.155                    |
| 2018            |         |             |                |                          |
| 16 June         | FSV     | 0.197       | 0.156          | 0.157                    |
|                 | HAN     | 0.213       | 0.158          | 0.158                    |
| 30 June         | FSV     | 0.172       | 0.156          | 0.156                    |
|                 | HAN     | 0.172       | 0.158          | 0.158                    |
| 02–03 July      | FSV     | 0.173       | 0.167          | 0.157                    |
|                 | HAN     | 0.173       | 0.167          | 0.158                    |
| 07 July         | FSV     | 0.184       | 0.176          | 0.192                    |
|                 | HAN     | 0.183       | 0.179          | 0.191                    |
| 21 July         | FSV     | 0.206       | 0.169          | 0.169                    |
|                 | HAN     | 0.206       | 0.169          | 0.169                    |
| 24 July         | FSV     | 0.184       | 0.156          | 0.156                    |
|                 | HAN     | 0.184       | 0.158          | 0.158                    |
| 01 August       | FSV     | 0.176       | 0.164          | 0.163                    |
|                 | HAN     | 0.176       | 0.163          | 0.163                    |
| 17 August       | FSV     | 0.171       | 0.154          | 0.154                    |
|                 | HAN     | 0.172       | 0.156          | 0.156                    |
| 20 August       | FSV     | 0.170       | 0.154          | 0.154                    |
|                 | HAN     | 0.171       | 0.156          | 0.156                    |
| 11–12 September | FSV     | 0.190       | 0.313          | 0.168                    |
|                 | HAN     | 0.192       | 0.309          | 0.171                    |

**Table S3.** WRF albedo during 2017 and 2018 at observation stations. WRF–3 km domain.

| <b>Date</b>     | <b>Station</b> | <b>Mean Albedo</b> | <b>Albedo at Noon</b> | <b>Albedo (Noon Avg. +/-1 h)</b> |
|-----------------|----------------|--------------------|-----------------------|----------------------------------|
| 2017            |                |                    |                       |                                  |
| 19–20 June      | FLE            | 0.144              | 0.144                 | 0.144                            |
|                 | NTK            | 0.144              | 0.144                 | 0.144                            |
| 19 July         | FLE            | 0.140              | 0.140                 | 0.140                            |
|                 | NTK            | 0.140              | 0.140                 | 0.140                            |
| 07 August       | FLE            | 0.135              | 0.135                 | 0.135                            |
|                 | NTK            | 0.135              | 0.135                 | 0.135                            |
| 2018            |                |                    |                       |                                  |
| 30 June         | FSV            | 0.142              | 0.142                 | 0.142                            |
|                 | HAN            | 0.152              | 0.152                 | 0.152                            |
| 02–03 July      | FSV            | 0.142              | 0.142                 | 0.142                            |
|                 | HAN            | 0.151              | 0.151                 | 0.151                            |
| 11–12 September | FSV            | 0.126              | 0.127                 | 0.126                            |
|                 | HAN            | 0.132              | 0.133                 | 0.132                            |

**Table S4.** Average albedo values per station. WRF–1 km domain.

| <b>Station</b> | <b>Avg (Mean)</b> | <b>Avg (Noon)</b> | <b>Avg (Noon Avg)</b> |
|----------------|-------------------|-------------------|-----------------------|
| FLE [213, 149] | 0.187             | 0.190             | 0.168                 |
| NTK [213, 149] | 0.187             | 0.190             | 0.168                 |
| FSV [213, 149] | 0.182             | 0.176             | 0.162                 |
| HAN [213, 148] | 0.184             | 0.177             | 0.163                 |

**Table S5.** Average albedo values per station. WRF–3 km domain.

| <b>Station</b> | <b>Avg (Mean)</b> | <b>Avg (Noon)</b> | <b>Avg (Noon Avg)</b> |
|----------------|-------------------|-------------------|-----------------------|
| FLE [75, 70]   | 0.139             | 0.140             | 0.139                 |
| NTK [75, 70]   | 0.139             | 0.140             | 0.139                 |
| FSV [75, 70]   | 0.137             | 0.137             | 0.137                 |
| HAN [75, 69]   | 0.145             | 0.145             | 0.145                 |

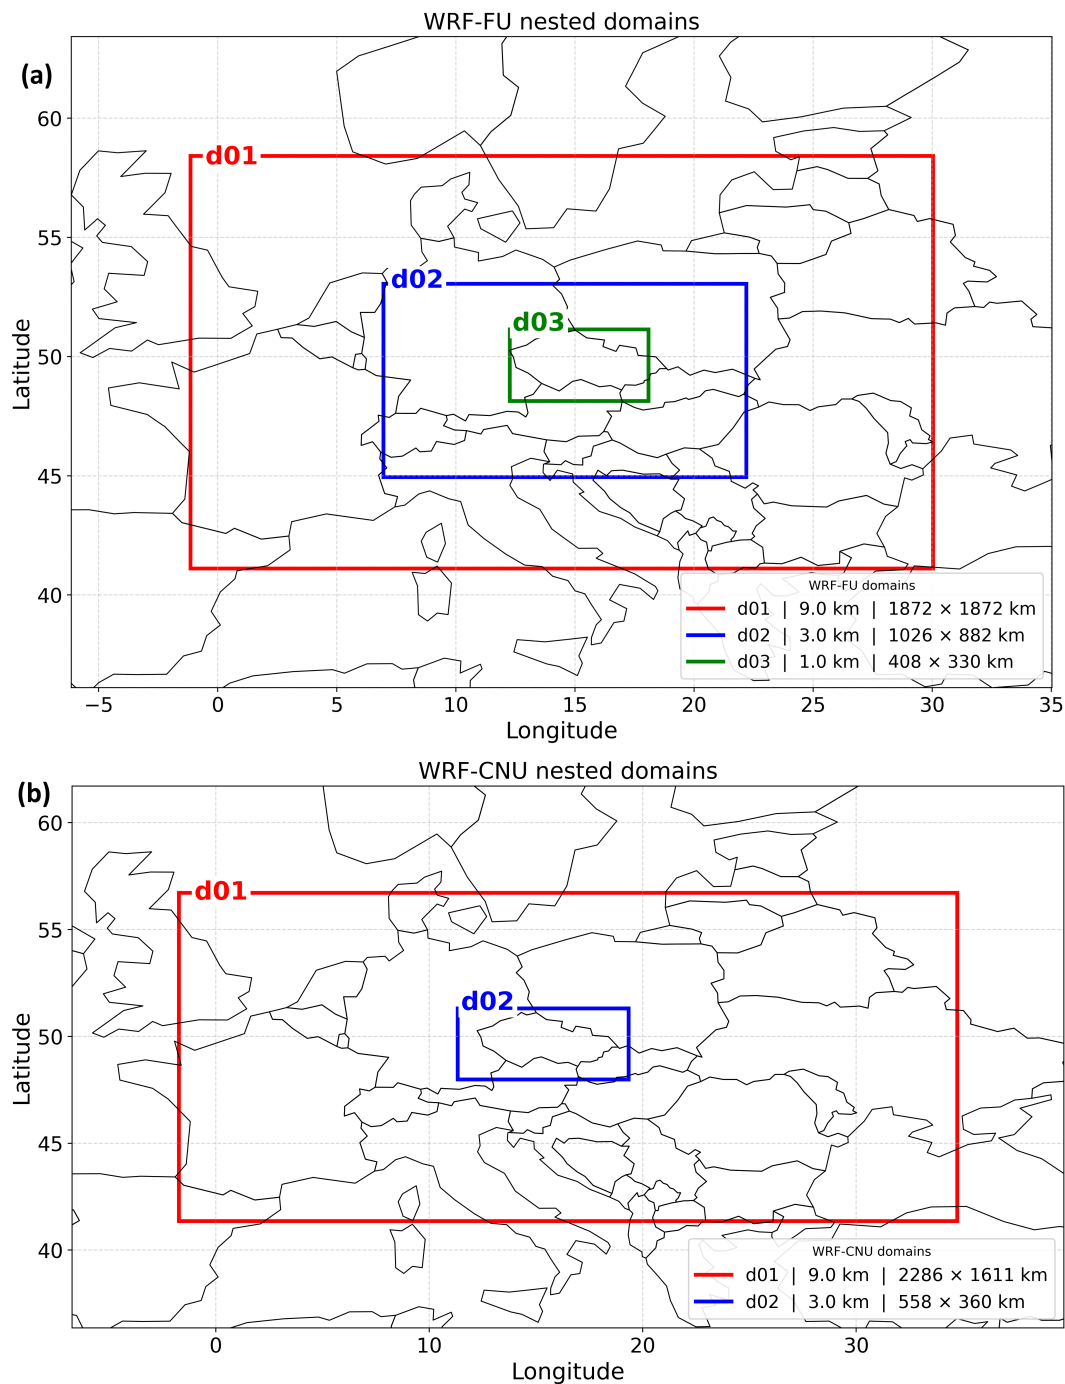

**Figure S14.** WRF model simulation domain configurations and nested grid hierarchies for the two experimental setups: (a) the three-domain WRF-FU setup (red: d01 at 9.0 km, blue: d02 at 3.0 km, and green: d03 at 1.0 km horizontal resolution) and (b) the two-domain WRF-CNU setup (red: d01 at 9.0 km and blue: d02 at 3.0 km horizontal resolution). The legends denote the horizontal grid spacing and total geographic coverage area for each parent and nested domain.

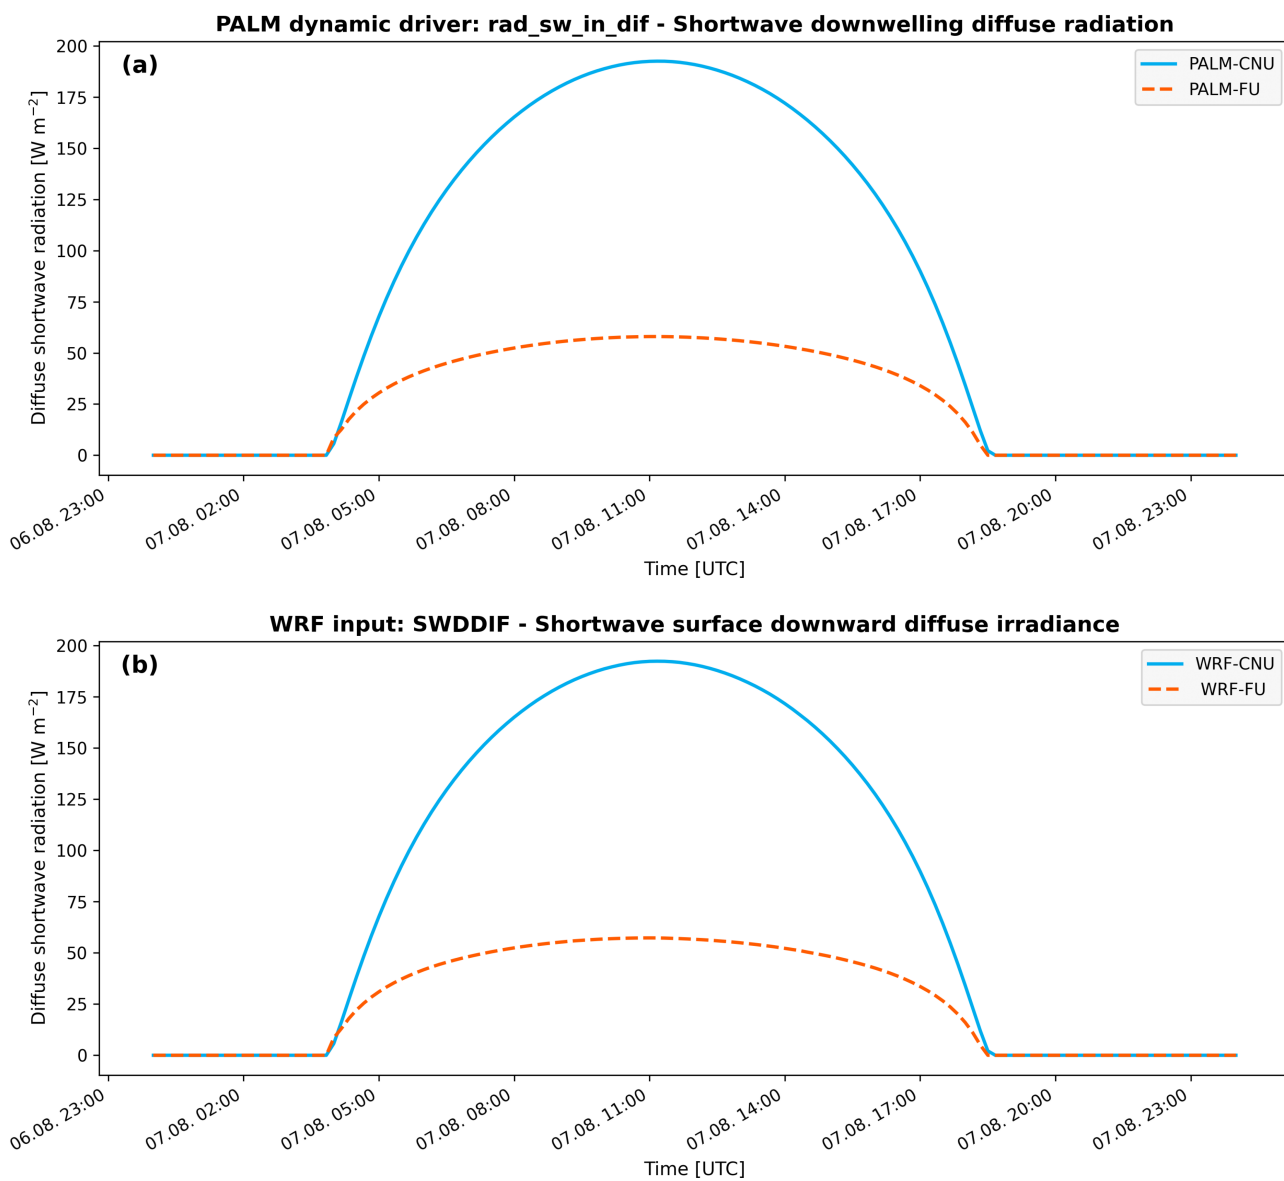

**Figure S15.** Comparison of diffuse short-wave radiation supplied to PALM-CNU (solid blue) and PALM-FU (dashed orange) setups through the dynamic driver (panel (a); variable rad\_sw\_in\_dif) with the corresponding forcing data from WRF-CNU (solid blue) and WRF-FU (dashed orange) (panel (b); variable SWDDIF) for the clear-sky episode e6 at the FLE station.

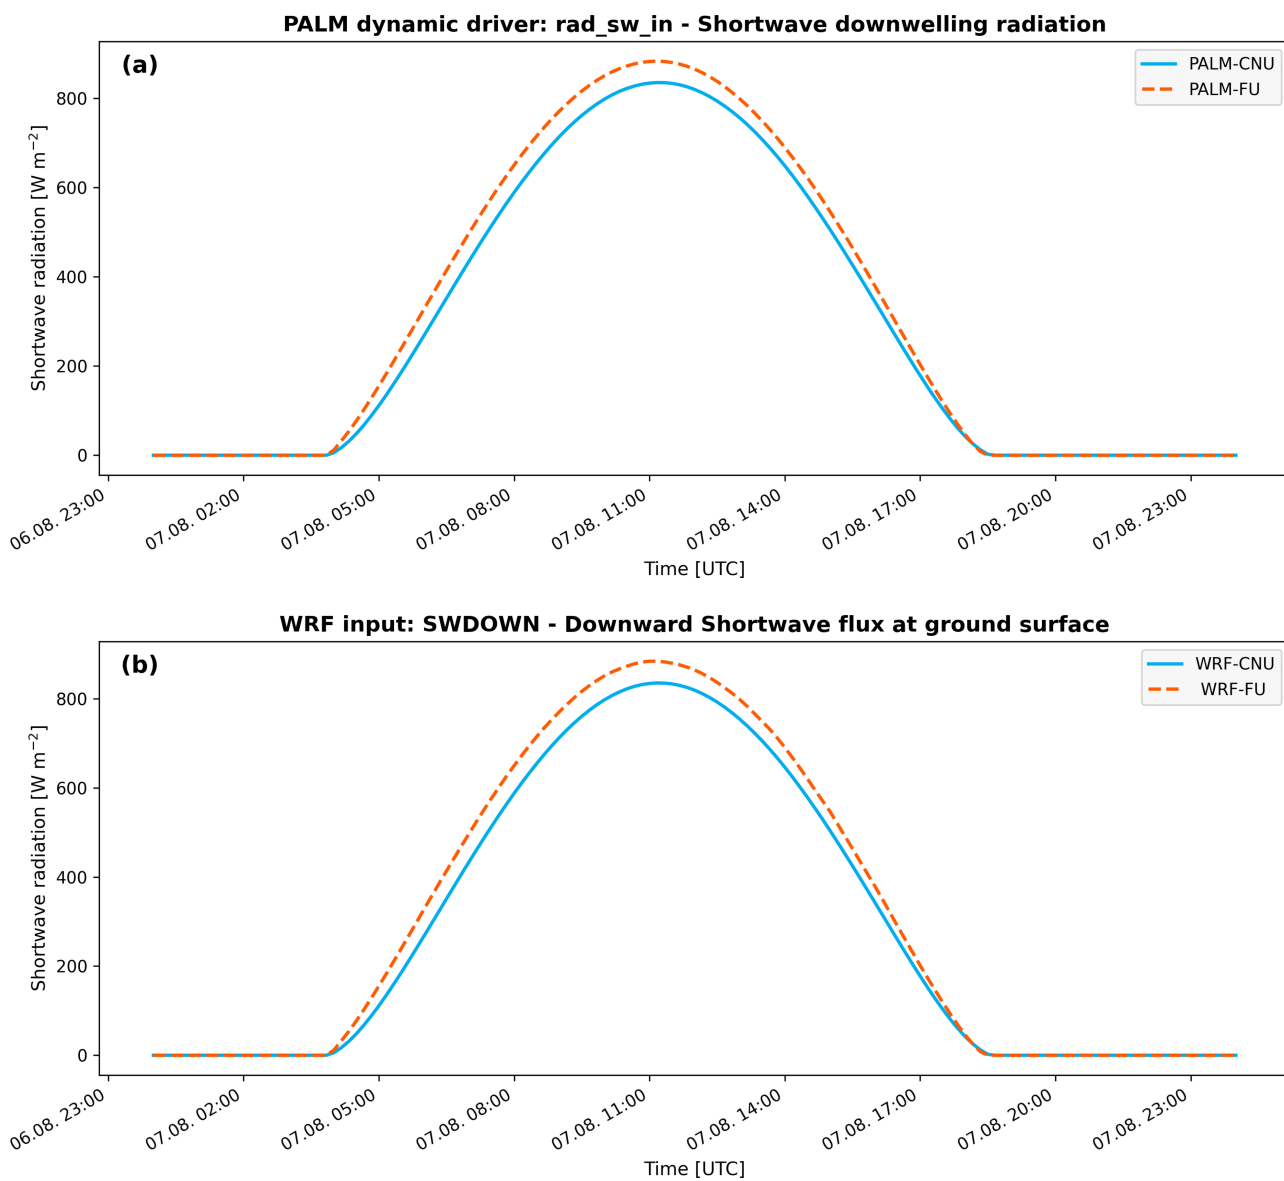

**Figure S16.** Comparison of the direct short-wave radiation supplied to PALM-CNU (solid blue) and PALM-FU (dashed orange) setups through the dynamic driver (panel (a); variable rad\_sw\_in) with the corresponding forcing data from WRF-CNU (solid blue) and WRF-FU (dashed orange) (panel (b); variable SWDOWN) for the clear-sky episode e6 at the FLE station.

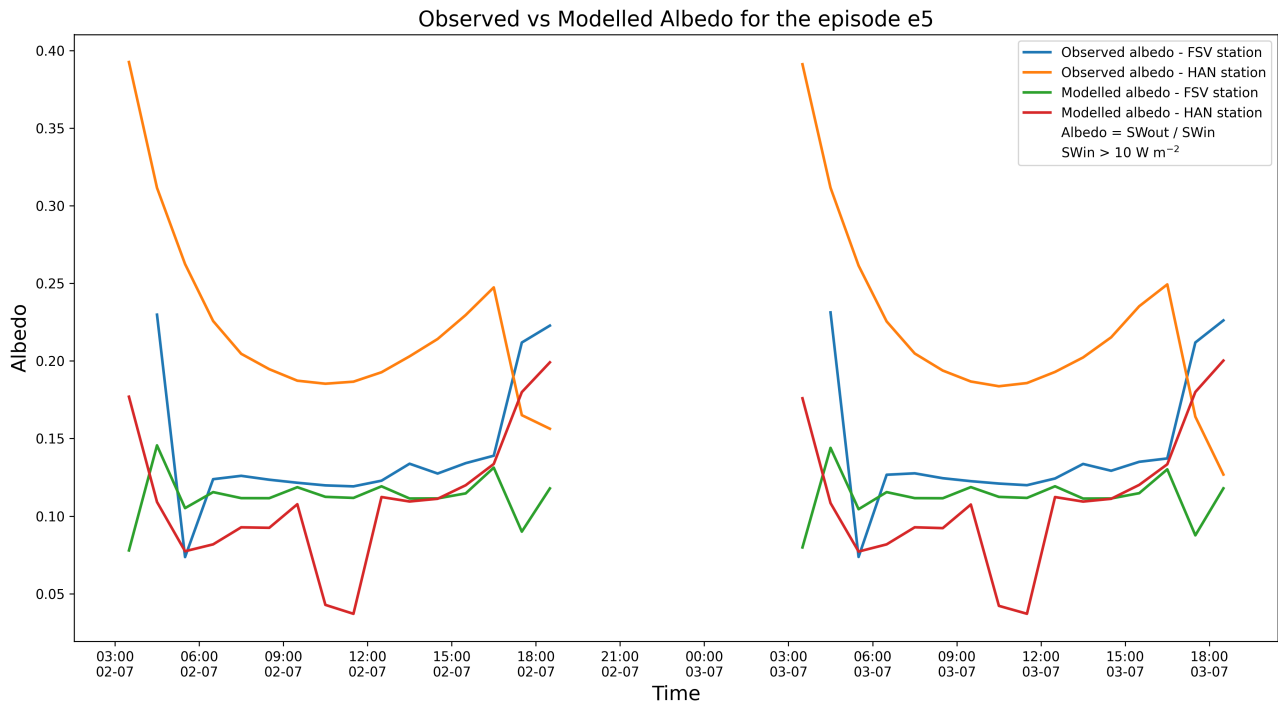

**Figure S17.** Comparison of observed and PALM-modelled albedo at the FSV and HAN stations during episode e5. Albedo was calculated as the ratio of reflected to incoming short-wave radiation ( $SW_{out}/SW_{in}$ ). Only periods with incoming short-wave radiation exceeding  $10 \text{ W m}^{-2}$  were considered.
